# Supplementary material
Source: PubMed Central journal article supplement (PMC6375436)
Supplement: ehp1655.s001.acco.pdf [file ehp1655.s001.acco.pdf]

**Note to readers with disabilities:** *EHP* strives to ensure that all journal content is accessible to all readers. However, some figures and Supplemental Material published in *EHP* articles may not conform to [508 standards](#) due to the complexity of the information being presented. If you need assistance accessing journal content, please contact [ehp508@niehs.nih.gov](mailto:ehp508@niehs.nih.gov). Our staff will work with you to assess and meet your accessibility needs within 3 working days.

### **Supplemental Material**

#### **Evaluation and Optimization of Pharmacokinetic Models for *in Vitro* to *in Vivo* Extrapolation of Estrogenic Activity for Environmental Chemicals**

Warren M. Casey, Xiaoqing Chang, David G. Allen, Patricia C. Ceger, Neepa Y. Choksi, Jui-Hua Hsieh, Barbara A. Wetmore, Stephen S. Ferguson, Michael J. DeVito, Catherine S. Sprinkle, and Nicole C. Kleinstreuer

#### **Table of Contents**

**Table S1.** EAD (mg/kg/day) values estimated from ACC<sub>ER</sub> using various pharmacokinetic models compared to *in vivo* uterotrophic LELs (mg/kg/day) (data for Figure 4 and Figure 5).

**Table S2.** Root mean squared error (RMSE) and mean residual values (MRV) for 8 pharmacokinetic model-adjustment combinations (data for Figure 2 and Figure 3).

**Table S3.** EAD values estimated from ACC<sub>ER</sub> using PPK model with  $f_u$  or EF adjustment for all the 266 ToxCast chemicals that are potential estrogen receptor agonists (data for Figure 6).

**Additional File-** Excel Document
